# Supplementary material for: Parallel Epigenomic and Transcriptomic Responses to Viral Infection in Honey Bees (Apis mellifera)
Source: PLoS Pathog. 2015 Mar 26;11(3):e1004713. doi: 10.1371/journal.ppat.1004713 (PMC4374888; doi:10.1371/journal.ppat.1004713)
Supplement: S2 Table — (XLSX) [file ppat.1004713.s004.xlsx]

## Sheet: Supp 2A
Supplementary Table 2A: differentially methylated genes
geneid	accession	gene name	flybaseID	exp_cfb	exp_tfb	meth_cfb_cds	meth_tfb_cds	q_DMG_exon	q_DEG	exp_change
GB54541-RA	XM_003249834.2	PREDICTED: Apis mellifera uncharacterized LOC100577408 (LOC100577408), transcript variant X1, mRNA	FBgn0031973	348.667	1379.33	0.140292	0.215327	3.02271e-10	0.00854951	+
GB51702-RA	XM_001122500.3	PREDICTED: Apis mellifera pre-mRNA-splicing factor ATP-dependent RNA helicase PRP16-like (LOC726778), mRNA	FBgn0026713	529.667	722.667	0.265129	0.328777	3.65165e-08	0.657744	+
GB45392-RA	XM_397222.5	PREDICTED: Apis mellifera c-Maf-inducing protein-like (LOC413783), transcript variant 1, mRNA	no	6.66667	14	0.0201933	0.00843584	5.72825e-08	0.534456	+
GB49219-RA	#N/A	#N/A	FBgn0031905	69	213.333	0.109054	0.0522345	1.58915e-06	0.315071	+
GB43636-RA	XM_393964.4	PREDICTED: Apis mellifera transmembrane and TPR repeat-containing protein CG4050-like (LOC410485), transcript variant 1, mRNA	FBgn0020312	507.667	810	0.198303	0.24628	1.38717e-05	0.463979	+
GB48881-RA	XM_006559778.1	PREDICTED: Apis mellifera c-1-tetrahydrofolate synthase, cytoplasmic (pug), mRNA	FBgn0020385	5730.67	1947.67	0.0312483	0.068702	3.36022e-05	0.0418466	-
GB49452-RA	XM_003249685.2	PREDICTED: Apis mellifera f-box/LRR-repeat protein 7-like (LOC726706), transcript variant 2, mRNA	FBgn0038385	225.333	294	0.668088	0.770697	3.36022e-05	0.746571	+
GB41782-RA	XM_006564697.1	PREDICTED: Apis mellifera glycine dehydrogenase [decarboxylating], mitochondrial-like (LOC100577053), mRNA	FBgn0037801	388	168	0.16082	0.204698	3.45199e-05	0.169547	-
GB54055-RA	XM_006562404.1	PREDICTED: Apis mellifera ubiquitin-specific protease 7 (Usp7), mRNA	no	2	0	0.496292	0.819354	7.02057e-05	0.257149	-
GB54271-RA	XM_006564456.1	PREDICTED: Apis mellifera tripeptidyl-peptidase 2 (TppII), mRNA	FBgn0027535	92.6667	72.3333	0.23056	0.286512	0.000233937	0.831182	-
GB55711-RA	XM_003251630.2	PREDICTED: Apis mellifera uncharacterized LOC100578257 (LOC100578257), mRNA	no	164.667	89	0.171788	0.267746	0.000496978	0.420874	-
GB45881-RA	XM_393548.5	PREDICTED: Apis mellifera type I inositol-3,4-bisphosphate 4-phosphatase-like (LOC410061), transcript variant X2, mRNA	FBgn0259166	160.333	286.333	0.0574686	0.073969	0.000920066	0.380873	+
GB42022-RA	XM_006564205.1	PREDICTED: Apis mellifera ubiquitin carboxyl-terminal hydrolase 34-like (LOC410109), mRNA	FBgn0039214	1261.33	1092	0.30988	0.340685	0.000920066	0.880843	-
GB42043-RA	XM_006564157.1	PREDICTED: Apis mellifera ribosome-releasing factor 2, mitochondrial (LOC408831), mRNA	FBgn0051159	463.667	239.667	0.127938	0.104726	0.000982457	0.251983	-
GB54649-RA	XM_006559960.1	PREDICTED: Apis mellifera uncharacterized LOC725503 (LOC725503), transcript variant X2, mRNA	FBgn0037098	2445.67	2971	0.259592	0.297891	0.000982457	0.811582	+
GB45814-RA	XM_006568624.1	PREDICTED: Apis mellifera putative E3 ubiquitin-protein ligase UBR7-like (LOC410726), transcript variant X2, mRNA	FBgn0032635	424	340.333	0.323251	0.375083	0.00154924	0.78207	-
GB55627-RA	XM_006568971.1	PREDICTED: Apis mellifera DNA polymerase subunit gamma-1, mitochondrial (tam), mRNA	FBgn0004406	61.6667	61.3333	0.588846	0.664887	0.00161558	0.995274	-
GB44363-RA	XM_006568322.1	PREDICTED: Apis mellifera rab11 family-interacting protein 4A-like (LOC409274), transcript variant X1, mRNA	FBgn0013718	301	651.333	0.094404	0.13129	0.00279719	0.232781	+
GB41852-RA	XM_006564525.1	PREDICTED: Apis mellifera uncharacterized LOC409243 (LOC409243), transcript variant X1, mRNA	FBgn0086690	1896	1539.67	0.234395	0.25823	0.00279719	0.808812	-
GB53221-RA	XM_006561914.1	PREDICTED: Apis mellifera uncharacterized LOC102653658 (LOC102653658), mRNA	no	1254.67	780	0.175686	0.229172	0.00333479	0.465588	-
GB46253-RA	XM_006559178.1	PREDICTED: Apis mellifera uncharacterized LOC100577972 (LOC100577972), mRNA	FBgn0029899	3221.67	2789	0.145332	0.165226	0.00398039	0.870729	-
GB50322-RA	XM_396197.5	PREDICTED: Apis mellifera WD repeat domain phosphoinositide-interacting protein 4-like (LOC412744), transcript variant X1, mRNA	no	217.667	221	0.619314	0.719053	0.00398039	0.988016	+
GB40562-RA	XM_006559654.1	PREDICTED: Apis mellifera zinc finger protein 418-like (LOC100578559), transcript variant X1, mRNA	no	57.3333	33.3333	0.209291	0.247309	0.0040381	0.531705	-
GB45440-RA	XM_003251603.2	PREDICTED: Apis mellifera sodium channel protein Nach-like (LOC100577346), mRNA	FBgn0065108	140.667	32.6667	0.0929066	0.0623573	0.00410512	0.0123983	-
GB41876-RA	XM_006564586.1	PREDICTED: Apis mellifera transcription factor RFX3-like (LOC411674), transcript variant X8, mRNA	FBgn0020379	6	13.3333	0.430575	0.484157	0.00436738	0.471591	+
GB41030-RA	XM_623090.4	PREDICTED: Apis mellifera UV excision repair protein RAD23 homolog B-like (LOC409340), transcript variant X2, mRNA	FBgn0026777	257.333	253.667	0.65665	0.769859	0.00436738	0.991156	-
GB47349-RA	XM_006569691.1	PREDICTED: Apis mellifera phosphoacetylglucosamine mutase-like (LOC725539), mRNA	FBgn0036298	124.667	79.3333	0.478938	0.728376	0.00564147	0.63199	-
GB50097-RA	XM_006563418.1	PREDICTED: Apis mellifera fumble (fbl), mRNA	FBgn0029667	37	22.3333	0.143268	0.182287	0.00564147	0.635323	-
GB52849-RA	XM_623410.4	PREDICTED: Apis mellifera optic atrophy 1-like (opa1-like), transcript variant X2, mRNA	FBgn0261276	140.667	114.333	0.220428	0.187937	0.00564147	0.812818	-
GB45429-RA	XM_006570898.1	PREDICTED: Apis mellifera uncharacterized LOC100578161 (LOC100578161), transcript variant X1, mRNA	FBgn0263198	646	782.333	0.269094	0.349841	0.00564147	0.841511	+
GB45363-RA	XM_006570896.1	PREDICTED: Apis mellifera uncharacterized LOC411638 (LOC411638), mRNA	FBgn0032728	70	74	0.384944	0.32253	0.00564147	0.970413	+
GB46583-RA	XM_006564709.1	PREDICTED: Apis mellifera inositol 1,4,5,-tris-phosphate receptor (Itpr1), transcript variant X2, mRNA	FBgn0010051	589	577	0.0443411	0.0554814	0.00564147	0.985818	-
GB51740-RA	XM_625096.3	PREDICTED: Apis mellifera tetraspanin 17 (Tspan17), mRNA	FBgn0032943	21.3333	21.6667	0.495733	0.633889	0.00564147	0.987072	+
GB54332-RA	XM_006557736.1	PREDICTED: Apis mellifera codanin-1-like (LOC726888), mRNA	FBgn0024510	96.6667	60.3333	0.232516	0.276817	0.00566568	0.676734	-
GB50202-RA	XM_006563518.1	PREDICTED: Apis mellifera poly(U)-binding-splicing factor half pint-like (LOC725115), transcript variant X6, mRNA	FBgn0028577	414	421.333	0.194981	0.227134	0.00618759	0.987095	+
GB51998-RA	XR_410839.1	PREDICTED: Apis mellifera uncharacterized LOC413753 (LOC413753), misc_RNA	FBgn0034976	1338.33	1399.67	0.259182	0.287586	0.00640226	0.974969	+
GB48308-RA	XM_006572095.1	PREDICTED: Apis mellifera probable pyruvate dehydrogenase E1 component subunit alpha, mitochondrial-like (LOC551103), transcript variant X2, mRNA	FBgn0028325	2683.67	1671	0.510635	0.629815	0.00675277	0.512957	-
GB51710-RA	XM_623282.4	PREDICTED: Apis mellifera eukaryotic initiation factor 4A-like (LOC411989), transcript variant X2, mRNA	FBgn0001942	7890.33	6433	0.195055	0.236257	0.00678639	0.804126	-
GB47217-RA	XM_006564403.1	PREDICTED: Apis mellifera diuretic hormone 31 receptor 1 (Dh31-R1), transcript variant X3, mRNA	FBgn0052843	331.667	205	0.166662	0.21101	0.00856969	0.500001	-
GB50095-RA	XM_393307.5	PREDICTED: Apis mellifera retinophilin protein (retinophilin), mRNA	FBgn0087005	122	78.6667	0.802991	0.917329	0.00868233	0.734891	-
GB49583-RA	NM_001242469.1	Apis mellifera ribosomal protein S14 (Rps14), mRNA	FBgn0004403	4106	2351	0.382995	0.497909	0.0102548	0.544958	-
GB42354-RA	XM_006570675.1	PREDICTED: Apis mellifera ATP-dependent Clp protease ATP-binding subunit clpX-like, mitochondrial-like (LOC411141), transcript variant X2, mRNA	FBgn0038745	142	173	0.228206	0.299402	0.0102548	0.861773	+
GB50470-RA	XM_006562663.1	PREDICTED: Apis mellifera uncharacterized protein KIAA0090-like (LOC552077), transcript variant X1, mRNA	FBgn0037530	1342	754.667	0.331531	0.369677	0.0112853	0.33714	-
GB50034-RA	#N/A	#N/A	FBgn0003248	NA	NA	0.0464259	0.0840257	0.0112853	NA	NA
GB41783-RA	XM_006564697.1	PREDICTED: Apis mellifera glycine dehydrogenase [decarboxylating], mitochondrial-like (LOC100577053), mRNA	no	251.667	124.667	0.0576707	0.134747	0.0117017	0.326011	-
GB42381-RA	XM_006570684.1	PREDICTED: Apis mellifera RING finger protein 126-like (LOC550689), transcript variant X2, mRNA	FBgn0037653	362	862.667	0.322791	0.409317	0.0117145	0.150133	+
GB42211-RA	XM_006571163.1	PREDICTED: Apis mellifera RNA-binding protein 10-like (LOC410688), mRNA	FBgn0031319	722.333	1625	0.148379	0.180495	0.0126252	0.152745	+
GB47335-RA	XM_006569644.1	PREDICTED: Apis mellifera polycomb protein Su(z)12 (Su(z)12), mRNA	FBgn0020887	13	10.6667	0.320863	0.205067	0.012781	0.934213	-
GB44113-RA	XM_006567127.1	PREDICTED: Apis mellifera alicorn (alc), transcript variant X2, mRNA	FBgn0260972	1261	1190.67	0.4451	0.590782	0.0131654	0.953747	-
GB54421-RA	XM_625271.4	PREDICTED: Apis mellifera uncharacterized LOC552006 (LOC552006), mRNA	no	1602.33	3370.67	0.152576	0.189967	0.0133433	0.219749	+
GB54939-RA	XM_006571515.1	PREDICTED: Apis mellifera rabconnectin-3B (Rbcn-3B), transcript variant X6, mRNA	FBgn0023510	162.333	188	0.327444	0.369518	0.0141761	0.864295	+
GB55457-RA	XM_006568798.1	PREDICTED: Apis mellifera uncharacterized LOC725376 (LOC725376), mRNA	FBgn0052425	76.6667	63.3333	0.29976	0.354468	0.0167116	0.846982	-
GB54927-RA	XM_392774.5	PREDICTED: Apis mellifera BRCA1-associated protein-like (LOC409251), transcript variant X2, mRNA	FBgn0038686	136.667	163.667	0.335152	0.40386	0.0167116	0.856352	+
GB40017-RA	XM_396550.5	PREDICTED: Apis mellifera enhancer of mRNA-decapping protein 4 homolog (Ge-1), mRNA	FBgn0032340	900	918.667	0.314081	0.351465	0.0167116	0.985344	+
GB42014-RA	XM_006564220.1	PREDICTED: Apis mellifera probable E3 ubiquitin-protein ligase TRIP12-like (LOC409382), transcript variant X3, mRNA	FBgn0260794	380.667	826	0.310107	0.326284	0.0194192	0.193431	+
GB50272-RA	XM_006563679.1	PREDICTED: Apis mellifera trans-1,2-dihydrobenzene-1,2-diol dehydrogenase-like (LOC412231), transcript variant X5, mRNA	FBgn0031418	1632.33	961	0.0907442	0.135542	0.0194737	0.41192	-
GB42086-RA	XM_006564215.1	PREDICTED: Apis mellifera single-strand selective monofunctional uracil DNA glycosylase-like (LOC413439), mRNA	FBgn0038490	47.6667	23.6667	0.538921	0.644216	0.0199723	0.398779	-
GB42997-RA	XM_003250542.2	PREDICTED: Apis mellifera uncharacterized LOC100578201 (LOC100578201), mRNA	no	1307.67	1440.33	0.186488	0.200163	0.0199723	0.930973	+
GB46539-RA	XM_006568479.1	PREDICTED: Apis mellifera protein vav-like (LOC413488), transcript variant X3, mRNA	FBgn0040068	251.333	350	0.147844	0.174019	0.0211437	0.722399	+
GB52725-RA	XM_394020.5	PREDICTED: Apis mellifera uncharacterized LOC410541 (LOC410541), mRNA	FBgn0034410	312	835.667	0.255312	0.288913	0.0220054	0.0751375	+
GB40348-RA	XR_408462.1	PREDICTED: Apis mellifera uncharacterized LOC552177 (LOC552177), misc_RNA	FBgn0015589	213.333	544	0.0243204	0.0325929	0.0220054	0.104295	+
GB40866-RA	NM_001160050.1	Apis mellifera heat shock protein cognate 4 (Hsc70-4), mRNA	FBgn0266599	38392	19431	0.0906906	0.111991	0.0220054	0.352168	-
GB40766-RA	XM_006563233.1	PREDICTED: Apis mellifera uncharacterized LOC410070 (LOC410070), transcript variant X1, mRNA	no	1004	620.667	0.0906993	0.103432	0.0220054	0.478519	-
GB53145-RA	XM_006558701.1	PREDICTED: Apis mellifera uncharacterized LOC726949 (LOC726949), transcript variant X1, mRNA	FBgn0039026	503.667	669.667	0.190303	0.172131	0.0220054	0.703926	+
GB45823-RA	XM_624011.4	PREDICTED: Apis mellifera pre-mRNA-processing-splicing factor 8-like (LOC551620), mRNA	FBgn0033688	783.333	792.333	0.172222	0.185395	0.0222672	0.9908	+
GB52628-RA	XM_006565524.1	PREDICTED: Apis mellifera heat shock factor (Hsf), transcript variant X1, mRNA	FBgn0001222	822	727	0.37544	0.422214	0.0230061	0.904205	-
GB41825-RA	XM_006564515.1	PREDICTED: Apis mellifera phospholipase A2 activator protein (Plap), mRNA	FBgn0024314	356.667	328.667	0.365548	0.321598	0.0235613	0.929989	-
GB51806-RA	XM_392150.4	PREDICTED: Apis mellifera fidipidine protein (fidipidine), transcript variant X3, mRNA	FBgn0025519	391.333	339	0.00614087	0.0272741	0.025386	0.855863	-
GB43167-RA	XM_006570271.1	PREDICTED: Apis mellifera inositol 1,4,5-triphosphate kinase (Ip3k), transcript variant X1, mRNA	no	64	90.3333	0.0453976	0.0596436	0.0255791	0.717359	+
GB47596-RA	XM_006561323.1	PREDICTED: Apis mellifera general transcription factor 3C polypeptide 1-like (LOC100577886), mRNA	FBgn0032517	260.333	186.667	0.210877	0.238922	0.0265855	0.706026	-
GB43118-RA	XM_001121334.3	PREDICTED: Apis mellifera peptidyl-prolyl cis-trans isomerase-like 4-like (LOC725497), transcript variant X1, mRNA	FBgn0027617	1693	826.667	0.214946	0.319558	0.0273877	0.236262	-
GB43163-RA	NM_001040237.1	Apis mellifera nuclear factor related to kappaB binding protein (NFRKB), mRNA	FBgn0027503	1689.33	2555.67	0.0699676	0.0806802	0.0273877	0.611202	+
GB49388-RA	XM_006565276.1	PREDICTED: Apis mellifera son of sevenless (Sos), mRNA	FBgn0001965	337.667	428	0.171908	0.20403	0.0273877	0.755407	+
GB51709-RA	XM_006569701.1	PREDICTED: Apis mellifera uncharacterized LOC102656541 (LOC102656541), transcript variant X1, mRNA	FBgn0032079	356.667	126.667	0.672916	0.788493	0.0308812	0.07749	-
GB43217-RA	XM_006570492.1	PREDICTED: Apis mellifera chiffon (chif), mRNA	FBgn0000307	1134.67	1377.33	0.16917	0.195425	0.0319398	0.834102	+
GB41775-RA	XM_006564610.1	PREDICTED: Apis mellifera integrator complex subunit 5-like (LOC413625), transcript variant X1, mRNA	FBgn0038168	240.667	338.333	0.277944	0.246008	0.033626	0.639584	+
GB41836-RA	XM_396906.5	PREDICTED: Apis mellifera cyclin-G-associated kinase-like (LOC413462), mRNA	FBgn0037218	612.667	498	0.230707	0.260733	0.033626	0.828976	-
GB42077-RA	XM_006564225.1	PREDICTED: Apis mellifera beta-mannosidase-like (LOC409334), mRNA	FBgn0037215	49	51	0.708582	0.627962	0.033626	0.97549	+
GB43826-RA	XM_392589.4	PREDICTED: Apis mellifera sugar transporter SWEET1-like (LOC409064), transcript variant X2, mRNA	FBgn0025469	33.3333	14.3333	0.100999	0.223192	0.033669	0.414793	-
GB42489-RA	XM_006565514.1	PREDICTED: Apis mellifera protein furry-like (LOC724660), mRNA	FBgn0016081	295	263.333	0.153183	0.167065	0.0340864	0.907006	-
GB55434-RA	XM_623194.4	PREDICTED: Apis mellifera GDP dissociation inhibitor (Gdi), mRNA	FBgn0004868	300	347.667	0.0289154	0.0129856	0.0348591	0.8993	+
GB45389-RA	XM_006570871.1	PREDICTED: Apis mellifera e3 ubiquitin-protein ligase RNF123-like (LOC410136), transcript variant X1, mRNA	FBgn0038296	164.333	128.333	0.361739	0.337524	0.0356612	0.83014	-
GB49839-RA	XM_396294.5	PREDICTED: Apis mellifera sorting nexin-8-like (LOC412842), transcript variant X2, mRNA	no	505	1219.33	0.0463965	0.0632066	0.0363719	0.154423	+
GB43857-RA	XM_393480.5	PREDICTED: Apis mellifera cadmus (cdm), transcript variant X3, mRNA	FBgn0261532	214.667	193.667	0.301357	0.279437	0.0363719	0.909124	-
GB50638-RA	XM_624090.3	PREDICTED: Apis mellifera late secretory pathway protein AVL9 homolog (LOC551701), transcript variant X2, mRNA	FBgn0030499	366.333	551.333	0.220237	0.239732	0.036973	0.612067	+
GB46459-RA	XM_006569995.1	PREDICTED: Apis mellifera islet cell autoantigen 1-like (LOC409351), transcript variant X1, mRNA	FBgn0037050	112.333	74.6667	0.455101	0.502698	0.036973	0.640217	-
GB41912-RA	XM_624405.4	PREDICTED: Apis mellifera uncharacterized oxidoreductase yrbE-like (LOC552024), mRNA	no	2757	702	0.0916569	0.0548488	0.0393344	0.033373	-
GB53081-RA	XM_623483.3	PREDICTED: Apis mellifera 33 kDa inner dynein arm light chain, axonemal-like (LOC551085), mRNA	FBgn0037962	16.3333	6.66667	0.454261	0.58022	0.0393344	0.391909	-
GB54656-RA	XM_623542.2	PREDICTED: Apis mellifera tRNA-dihydrouridine synthase 4-like (LOC551147), transcript variant X4, mRNA	FBgn0032750	148.333	91.6667	0.643988	0.799901	0.0393344	0.546923	-
GB41862-RA	XM_006564545.1	PREDICTED: Apis mellifera protein kinase C delta (Pkcdelta), transcript variant X1, mRNA	FBgn0259680	343.333	495	0.024104	0.011886	0.0393344	0.585054	+
GB44903-RA	XM_623748.3	PREDICTED: Apis mellifera calcineurin subunit B type 2-like (LOC551313), mRNA	FBgn0015614	77.3333	39	0.588253	0.728978	0.0394005	0.576873	-
GB45694-RA	XM_395206.5	PREDICTED: Apis mellifera lutropin-choriogonadotropic hormone receptor-like (LOC411738), transcript variant X1, mRNA	FBgn0003255	14.3333	53.6667	0.0359447	0.0437792	0.0399302	0.196598	+
GB45478-RA	XM_006570960.1	PREDICTED: Apis mellifera WD repeat-containing protein on Y chromosome-like (LOC413900), mRNA	FBgn0085498	27	13	0.253508	0.218806	0.0404537	0.444002	-
GB50623-RA	XM_392816.5	PREDICTED: Apis mellifera sulfatase-modifying factor 1-like (LOC409298), transcript variant 2, mRNA	FBgn0035102	208	152.333	0.476727	0.577471	0.0405214	0.695128	-
GB48932-RA	XM_006571300.1	PREDICTED: Apis mellifera immune response deficient 1 (ird1), transcript variant X1, mRNA	FBgn0260935	375.333	352	0.385408	0.430157	0.0405214	0.948792	-
GB46915-RA	XM_392956.5	PREDICTED: Apis mellifera phosphotyrosyl phosphatase activator (Ptpa), transcript variant X3, mRNA	FBgn0016698	270	276	0.356071	0.467178	0.0405214	0.981807	+
GB52253-RA	XM_003251775.2	PREDICTED: Apis mellifera uncharacterized LOC409242 (LOC409242), transcript variant X1, mRNA	FBgn0261710	8488	8411	0.050455	0.0626785	0.0405214	0.991664	-
GB42436-RA	XM_392453.5	PREDICTED: Apis mellifera protein arginine N-methyltransferase 7-like (LOC408925), transcript variant X2, mRNA	FBgn0034817	295.333	294	0.13514	0.164522	0.0405214	0.995682	-
GB48553-RA	#N/A	#N/A	no	NA	NA	0.31778	0.113095	0.0407082	NA	NA
GB41233-RA	XM_006569202.1	PREDICTED: Apis mellifera trifunctional purine biosynthetic protein adenosine-3-like (LOC100577675), mRNA	FBgn0000053	403.333	166.667	0.292791	0.342874	0.043726	0.114938	-
GB50853-RA	XM_006561176.1	PREDICTED: Apis mellifera SET domain binding factor (Sbf), transcript variant X1, mRNA	FBgn0025802	114.333	247.667	0.255316	0.276705	0.043726	0.306187	+
GB53019-RA	XM_392305.5	PREDICTED: Apis mellifera ankyrin repeat domain-containing protein 49-like (LOC408773), mRNA	FBgn0261881	101.333	47.6667	0.165639	0.115091	0.0453807	0.281433	-
GB50274-RA	XM_006563682.1	PREDICTED: Apis mellifera transitional endoplasmic reticulum ATPase TER94 (TER94), mRNA	FBgn0261014	2163.67	1953.33	0.336524	0.32433	0.045909	0.932257	-
GB55624-RA	XM_394301.4	PREDICTED: Apis mellifera leucine-rich repeat and immunoglobulin-like domain-containing nogo receptor-interacting protein 2-like (LOC410825), transcript variant X2, mRNA	FBgn0032479	153	202.667	0.005356	0.00130872	0.0462516	0.735352	+
GB47089-RA	XM_395910.5	PREDICTED: Apis mellifera uncharacterized LOC412453 (LOC412453), transcript variant X2, mRNA	no	298.333	378.333	0.279474	0.347445	0.0467509	0.753662	+
GB41188-RA	XM_001120768.3	PREDICTED: Apis mellifera ABC transporter G family member 20-like (LOC724865), partial mRNA	no	1519.67	1049.33	0.166877	0.230131	0.0488601	0.715873	-
GB48203-RA	XM_006571766.1	PREDICTED: Apis mellifera laminin B1 (LanB1), transcript variant X2, mRNA	FBgn0261800	252	220	0.0321312	0.0432332	0.0505541	0.881927	-
GB43888-RA	XM_395835.5	PREDICTED: Apis mellifera hyrax (hyx), mRNA	FBgn0037657	250.333	474.333	0.276748	0.324958	0.0516	0.322213	+
GB41069-RA	XM_393418.5	PREDICTED: Apis mellifera pyridoxal-dependent decarboxylase domain-containing protein 1-like (LOC409927), transcript variant X2, mRNA	FBgn0031174	91.3333	183.333	0.21226	0.234355	0.0535955	0.382487	+
GB50271-RA	XM_006563730.1	PREDICTED: Apis mellifera zinc transporter 1-like (LOC552634), mRNA	FBgn0035432	761.333	751.667	0.211865	0.245089	0.0535955	0.989897	-
GB54657-RA	XM_006559948.1	PREDICTED: Apis mellifera Rad54 protein (Rad54), transcript variant X1, mRNA	FBgn0002989	440.667	324.667	0.392828	0.449564	0.0540792	0.659267	-
GB52559-RA	NM_001185086.1	Apis mellifera BBSome-interacting protein 1-like (BBIP1), mRNA	FBgn0037689	228	169.333	0.31488	0.378343	0.0540792	0.747203	-
GB43157-RA	XM_006570484.1	PREDICTED: Apis mellifera tyrosine-protein phosphatase non-receptor type 23-like (LOC551449), mRNA	FBgn0036448	716.333	907.667	0.226708	0.257502	0.0540792	0.781908	+
GB42817-RA	XM_392828.5	PREDICTED: Apis mellifera transmembrane protein 63A-like (LOC409310), transcript variant X3, mRNA	FBgn0033259	372.667	289.333	0.388955	0.451664	0.0553678	0.731637	-
GB49549-RA	XM_393288.5	PREDICTED: Apis mellifera ubiquitin-conjugating enzyme E2 J1-like (LOC409794), mRNA	no	176.333	316.667	0.286313	0.351563	0.0554442	0.4272	+
GB49769-RA	XM_392223.5	PREDICTED: Apis mellifera putative ribosomal RNA methyltransferase 1-like (LOC408687), transcript variant 1, mRNA	FBgn0038471	510	750.667	0.382938	0.32465	0.0556572	0.620202	+
GB42747-RA	XM_006561567.1	PREDICTED: Apis mellifera la-related protein 4-like (LOC411476), transcript variant X1, mRNA	FBgn0035424	52.3333	95	0.318589	0.372619	0.0589951	0.528945	+
GB49773-RA	XM_392222.5	PREDICTED: Apis mellifera refractory to sigma P (ref(2)P), mRNA	FBgn0003231	6469	3923.33	0.508585	0.600577	0.0595505	0.450143	-
GB46217-RA	XM_392993.5	PREDICTED: Apis mellifera cytoplasmic aconitate hydratase-like (LOC409485), transcript variant 1, mRNA	FBgn0024957	557.667	486	0.104786	0.089604	0.0595505	0.892879	-
GB46028-RA	XM_006562424.1	PREDICTED: Apis mellifera e3 ubiquitin-protein ligase RNF14-like (LOC552305), mRNA	no	87	49.6667	0.815868	0.739862	0.0621996	0.480146	-
GB52637-RA	XM_006565523.1	PREDICTED: Apis mellifera CDC42 small effector protein homolog (Spec2), transcript variant X2, mRNA	FBgn0044823	20	18.3333	0.717376	0.528562	0.0621996	0.963854	-
GB53268-RA	XM_394975.5	PREDICTED: Apis mellifera SPARC-related modular calcium-binding protein 1-like (LOC411502), mRNA	FBgn0262169	231.333	182.333	0.0130168	0.0297166	0.0624648	0.815763	-
GB51589-RA	XM_003251677.2	PREDICTED: Apis mellifera nuclear pore membrane glycoprotein 210-like (LOC100577501), mRNA	FBgn0266580	62.6667	50.3333	0.333118	0.369536	0.0624648	0.840239	-
GB55366-RA	XM_006569001.1	PREDICTED: Apis mellifera uncharacterized LOC725589 (LOC725589), transcript variant X1, mRNA	FBgn0027376	34.3333	13	0.281251	0.329736	0.0636227	0.234319	-
GB49329-RA	XM_396742.4	PREDICTED: Apis mellifera putative transmembrane protein 185B-like (LOC413297), transcript variant X2, mRNA	FBgn0030996	53.6667	53.3333	0.782399	0.903068	0.0636227	0.990803	-
GB41669-RA	XM_392920.5	PREDICTED: Apis mellifera deterin (Det), transcript variant X2, mRNA	FBgn0264291	172.333	194.667	0.196637	0.272997	0.0651092	0.904253	+
GB55463-RA	XM_392611.5	PREDICTED: Apis mellifera uncharacterized LOC409086 (LOC409086), mRNA	FBgn0042134	1191.33	1238.67	0.115425	0.0915926	0.065416	0.973642	+
GB41850-RA	XM_006564518.1	PREDICTED: Apis mellifera hemolectin (Hml), transcript variant X1, mRNA	FBgn0029167	191.333	87.6667	0.17298	0.19167	0.065425	0.232489	-
GB44061-RA	XM_392642.4	PREDICTED: Apis mellifera vacuolar protein sorting 16A (Vps16A), transcript variant X3, mRNA	FBgn0261241	184.333	145.333	0.343547	0.311162	0.0669334	0.837337	-
GB45755-RA	XM_006571990.1	PREDICTED: Apis mellifera short spindle 3 (ssp3), transcript variant X2, mRNA	FBgn0032723	642	857.667	0.336306	0.393743	0.0729593	0.710366	+
GB52751-RA	XM_006564848.1	PREDICTED: Apis mellifera uncharacterized LOC551823 (LOC551823), mRNA	FBgn0032690	1331	1040.33	0.269468	0.30681	0.0729593	0.744574	-
GB51349-RA	XM_006559392.1	PREDICTED: Apis mellifera kinesin 7A (kinesin-7A), mRNA	FBgn0040232	35.3333	26.6667	0.197358	0.217844	0.0729593	0.777241	-
GB49311-RA	XM_006565241.1	PREDICTED: Apis mellifera TD and POZ domain-containing protein 5-like (LOC100577913), transcript variant X3, mRNA	no	424.667	463	0.0188543	0.0328784	0.0730241	0.930666	+
GB50701-RA	XM_395844.5	PREDICTED: Apis mellifera pleckstrin homology domain-containing family M member 1-like (LOC412386), mRNA	FBgn0034694	830.333	894.667	0.46234	0.510344	0.0730241	0.94434	+
GB48264-RA	#N/A	#N/A	FBgn0040394	119.667	260.667	0.0525465	0.0281943	0.0736112	0.272101	+
GB50921-RA	XM_006566240.1	PREDICTED: Apis mellifera DNA replication licensing factor REC (rec), partial mRNA	no	120.667	122.667	0.0332273	0.0616538	0.0739508	0.985996	+
GB45566-RA	XM_003251750.2	PREDICTED: Apis mellifera stambha A (stmA), transcript variant X2, mRNA	FBgn0086784	156	352.333	0.425481	0.427981	0.0749287	0.232074	+
GB40895-RA	XM_623736.3	PREDICTED: Apis mellifera WD repeat domain-containing protein 83-like (LOC551339), transcript variant 1, mRNA	FBgn0028897	123	81.6667	0.703814	0.75351	0.0749287	0.59893	-
GB49250-RA	NM_001011641.1	Apis mellifera heme oxygenase (Ho), mRNA	FBgn0037933	59.3333	41	0.345348	0.520769	0.0749287	0.797495	-
GB40774-RA	XM_006563221.1	PREDICTED: Apis mellifera regulator of telomere elongation helicase 1 homolog (LOC412546), mRNA	FBgn0029798	49	13.6667	0.543172	0.43945	0.0750416	0.103211	-
GB46898-RA	XM_006559682.1	PREDICTED: Apis mellifera transcription initiation factor TFIID subunit 7 (Taf7), transcript variant X3, mRNA	FBgn0024909	229	277.667	0.296261	0.354557	0.0778341	0.817847	+
GB42719-RA	XM_006561622.1	PREDICTED: Apis mellifera e3 ubiquitin-protein ligase MARCH8-like (LOC725067), transcript variant X1, mRNA	FBgn0035983	364.667	326	0.492892	0.558951	0.0778341	0.894252	-
GB46202-RA	NM_001242517.1	Apis mellifera inhibitor of growth family, member 3 (Ing3), mRNA	FBgn0030945	53.6667	105	0.210756	0.179086	0.0826947	0.368541	+
GB43176-RA	XR_411806.1	PREDICTED: Apis mellifera ras-related protein Ral-a-like (LOC102656587), transcript variant X5, misc_RNA	FBgn0015286	207	191	0.37488	0.52202	0.0835101	0.940004	-
GB42780-RA	XM_006561625.1	PREDICTED: Apis mellifera CCHC-type zinc finger protein CG3800-like (LOC725076), transcript variant X3, mRNA	FBgn0034802	60	134	0.503613	0.605436	0.0852622	0.490816	+
GB55969-RA	XM_006572070.1	PREDICTED: Apis mellifera Painting of fourth (Pof), transcript variant X2, mRNA	FBgn0035047	284.333	346	0.530135	0.538374	0.0852622	0.795684	+
GB44341-RA	XM_006568374.1	PREDICTED: Apis mellifera transcription initiation factor TFIID subunit 1 (Taf1), mRNA	FBgn0010355	616.667	607.333	0.215083	0.229685	0.0852622	0.988189	-
GB44317-RA	XR_410540.1	PREDICTED: Apis mellifera uncharacterized LOC102655526 (LOC102655526), ncRNA	no	45.3333	152.333	0.133397	0.158507	0.0869099	0.0627473	+
GB43915-RA	XM_006563845.1	PREDICTED: Apis mellifera uncharacterized LOC100577825 (LOC100577825), transcript variant X1, mRNA	FBgn0053017	2.66667	7	0.0648467	0.0257804	0.0869099	0.504408	+
GB45831-RA	XM_393249.5	PREDICTED: Apis mellifera alpha-parvin-like (LOC409755), mRNA	FBgn0052528	2352.33	2301.33	0.481674	0.50946	0.0869099	0.985344	-
GB42037-RA	XM_006564177.1	PREDICTED: Apis mellifera condensin complex subunit 3-like (LOC413691), mRNA	FBgn0259876	13	4	0.291948	0.228413	0.0884268	0.307667	-
GB48601-RA	XM_006564145.1	PREDICTED: Apis mellifera phosphotidylinositol 3 kinase 59F ortholog (LOC725770), mRNA	FBgn0015277	344	253.667	0.535714	0.59216	0.0890322	0.675075	-
GB53538-RA	XM_394619.5	PREDICTED: Apis mellifera nischarin-like (LOC411145), mRNA	FBgn0033996	50	94.6667	0.215949	0.275832	0.0891534	0.454727	+
GB54510-RA	XM_394725.5	PREDICTED: Apis mellifera GTP-binding protein 2-like (LOC411252), transcript variant X1, mRNA	FBgn0037391	372.333	953	0.369721	0.407909	0.0897107	0.115881	+
GB48949-RA	XM_006571310.1	PREDICTED: Apis mellifera importin 7 (IPO7), transcript variant X2, mRNA	FBgn0026252	429.333	377	0.404117	0.428539	0.0908348	0.876005	-
GB50587-RA	XM_394099.5	PREDICTED: Apis mellifera uncharacterized LOC410622 (LOC410622), mRNA	FBgn0029944	60.3333	71	0.369187	0.312772	0.0999874	0.90802	+

## Sheet: Supp 2B
Supplementary Table 2B: Pathways associated with differentially methylated genes.
Annotation Cluster 1	Enrichment Score: 1.73	Count	P_Value	Benjamini
PANTHER_PATHWAY	P00053:T cell activation	5	0.00041	0.014
PANTHER_PATHWAY	P00010:B cell activation	4	0.0034	0.058
PANTHER_PATHWAY	P00047:PDGF signaling pathway	5	0.0037	0.042
PANTHER_PATHWAY	P00031:Inflammation mediated by chemokine and cytokine signaling pathway	4	0.032	0.25
PANTHER_PATHWAY	P00005:Angiogenesis	4	0.04	0.25
PANTHER_PATHWAY	P00021:FGF signaling pathway	3	0.12	0.46
PANTHER_PATHWAY	P00019:Endothelin signaling pathway	3	0.13	0.45
PANTHER_PATHWAY	P00018:EGF receptor signaling pathway	3	0.14	0.44

## Sheet: Supp 2C
Supplementary Table 2C: significantly differentially methylated genes in the T-cell activation pathway.
FLYBASE_GENE_ID	GENE NAME
FBgn0010051	Inositol 1,4,5,-tris-phosphate receptor
FBgn0015277	Phosphotidylinositol 3 kinase 59F
FBgn0259680	Protein kinase C delta
FBgn0040068	Protein vav
FBgn0001965	Son of sevenless

## Sheet: Supp 2D
Supplementary Table 2D: Overlap between differentially expressed and differentially methylated genes
geneid	meth_cfb_cds	meth_tfb_cds	exp_change
GB45440-RA	0.0929066	0.0623573	-
GB54541-RA	0.140292	0.215327	+
GB41912-RA	0.0916569	0.0548488	-
GB48881-RA	0.0312483	0.068702	-
